# Supplementary material for: Be positive: customized reference databases and new, local barcodes balance false taxonomic assignments in metabarcoding studies
Source: PeerJ journal article supplement (doi:10.7717/peerj.14616), 2023-01-09

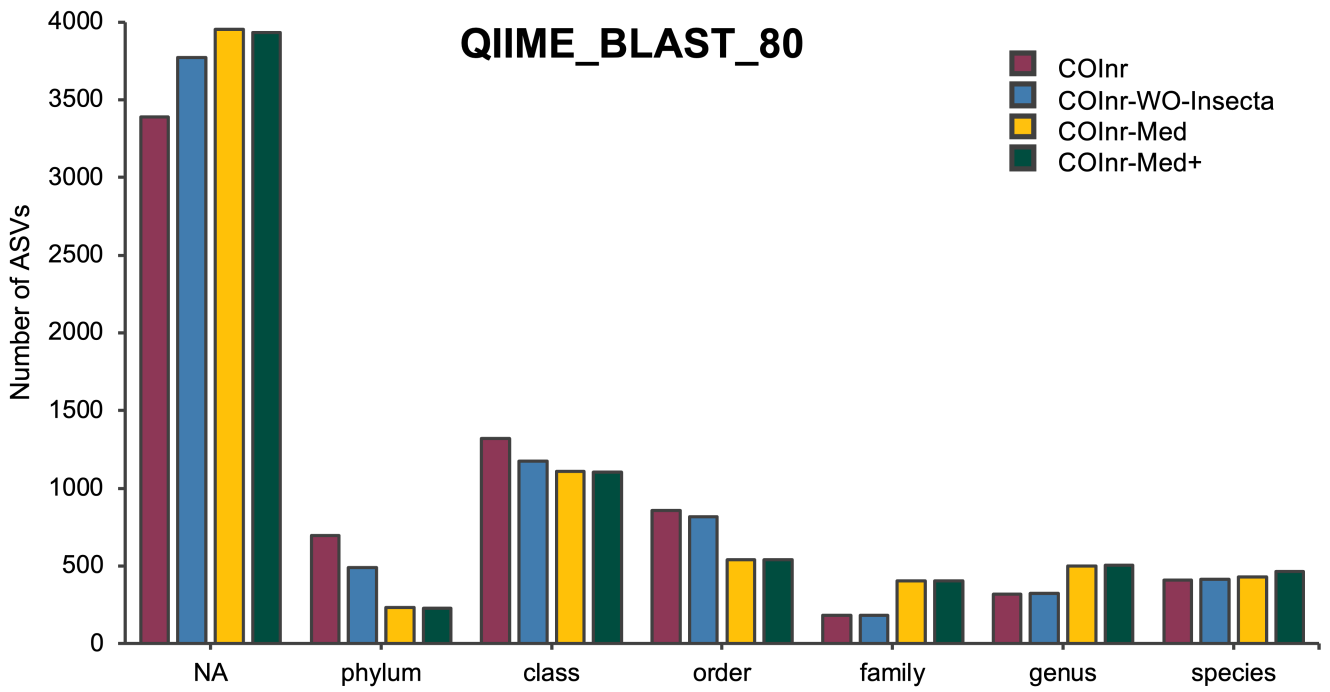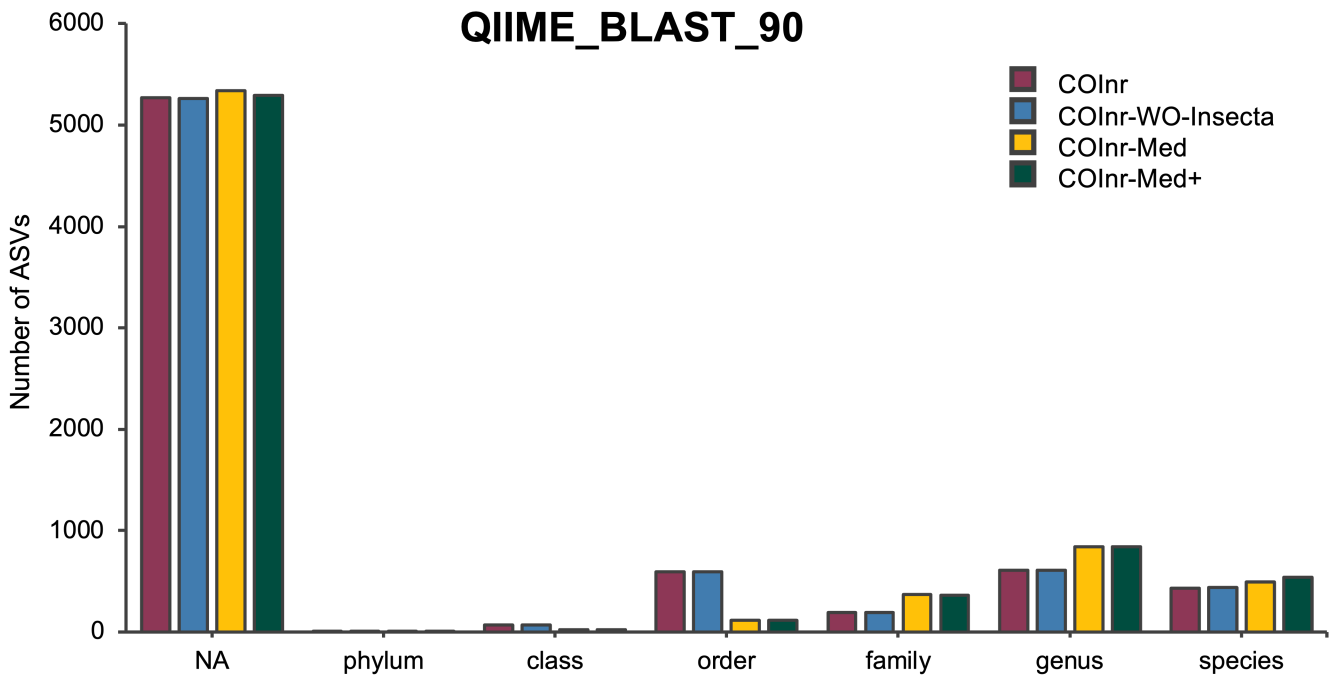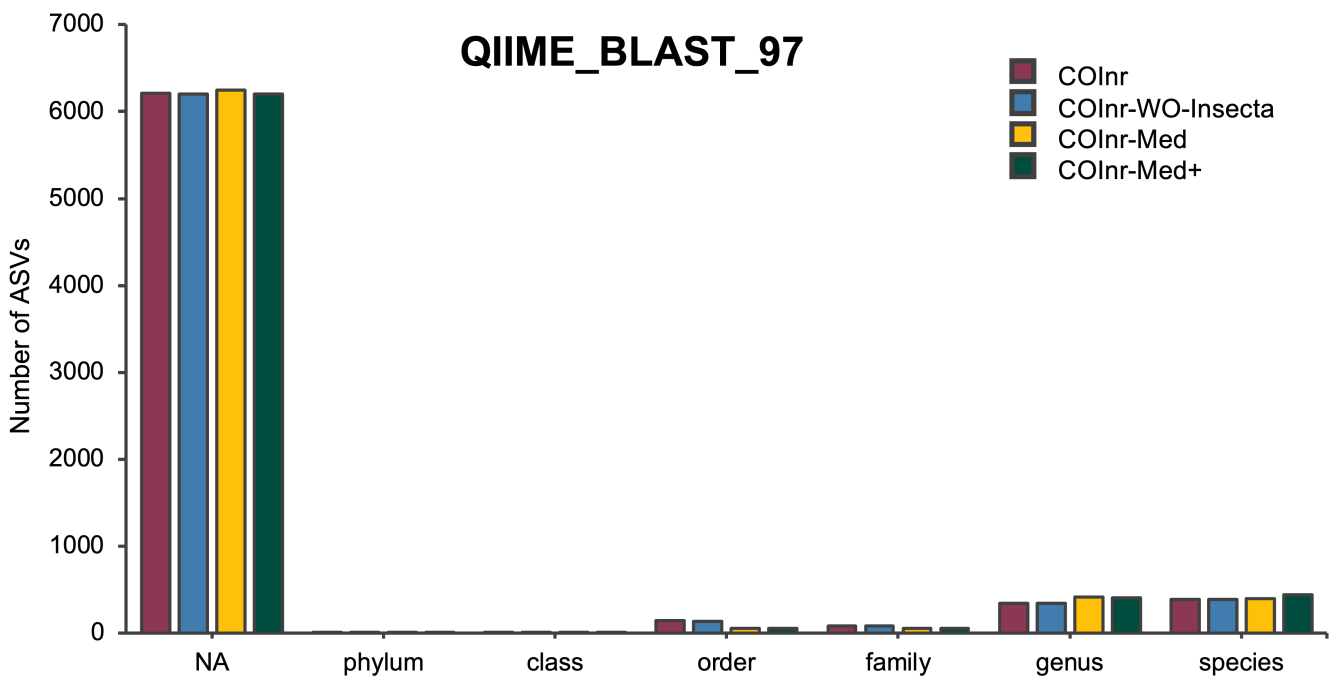

Supplement: Figure_S1.pdf [file Figure_S1.pdf]
