# Supplementary material for: Be positive: customized reference databases and new, local barcodes balance false taxonomic assignments in metabarcoding studies
Source: PeerJ journal article supplement (doi:10.7717/peerj.14616), 2023-01-09

## VTAM

## RDP

## QIIME\_SKLEARN

## QIIME\_BLAST\_80

COInr vs  
COInr-WO-Insecta

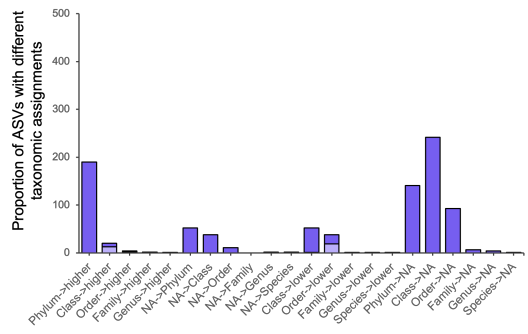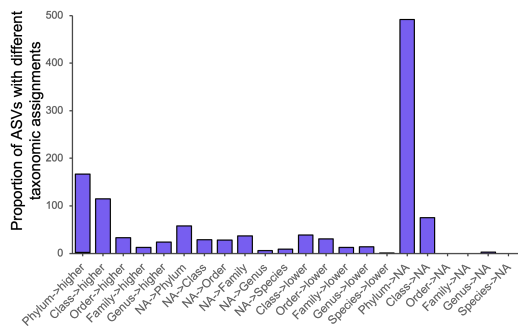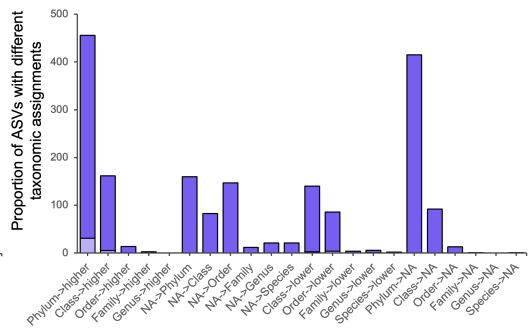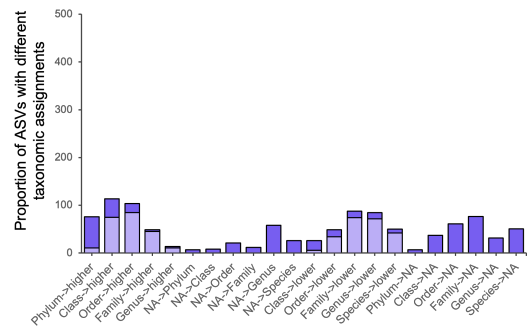

COInr-WO-Insecta vs  
COInr-Med

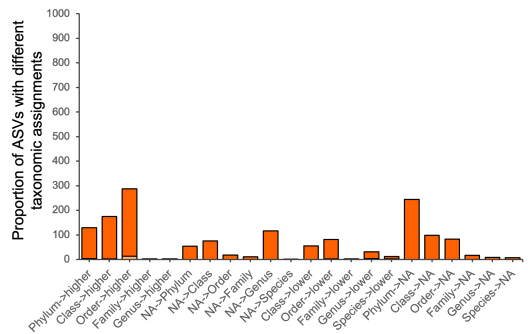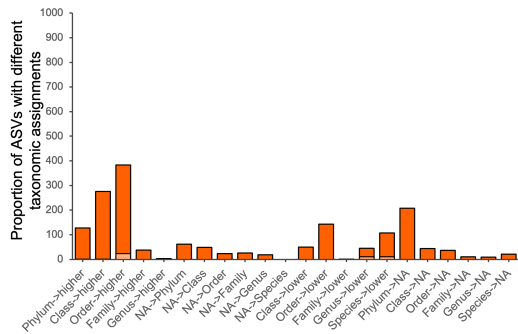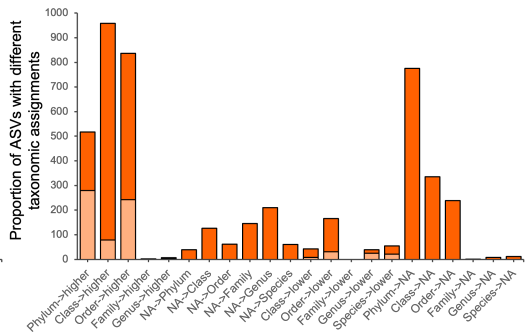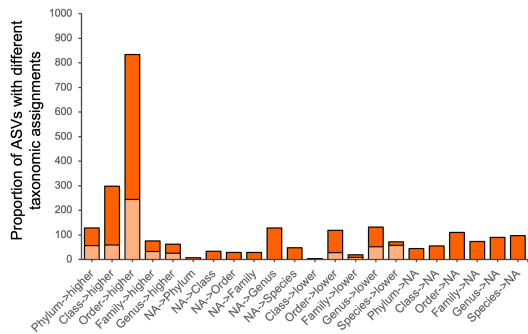

COInr-Med vs  
COInr-Med+

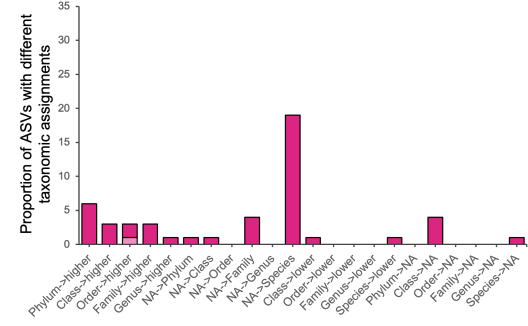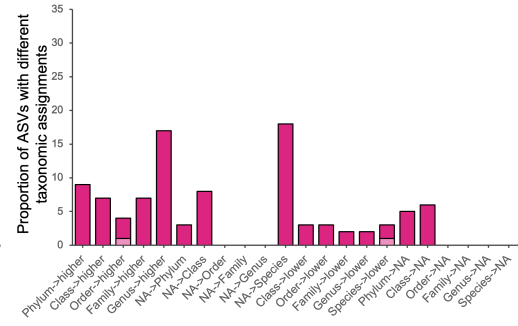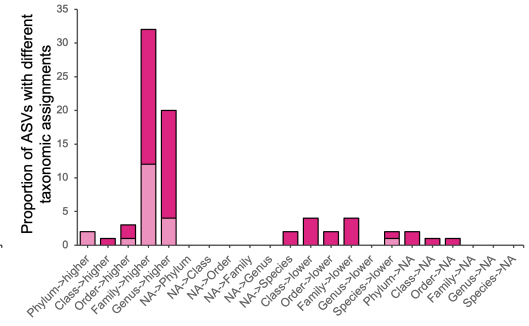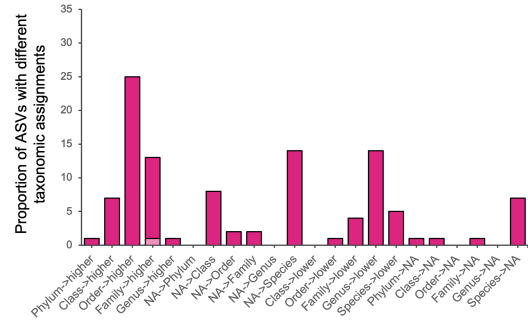

Supplement: Figure_S2.pdf [file Figure_S2.pdf]
